# Supplementary material for: Characterization of comorbidity heterogeneity among 13,667 patients with hidradenitis suppurativa
Source: PubMed Central journal article supplement (PMC8663549; doi:10.1172/jci.insight.151872), 2021-11-08
Supplement: jciinsight-6-151872-s080.pdf [file jciinsight-6-151872-s080.pdf]

**Supplementary Table 1: ICD-9 and ICD-10 Codes**

| Comorbidity            | ICD-10                                                                               | ICD-9                                                                             | Notes                                   |
|------------------------|--------------------------------------------------------------------------------------|-----------------------------------------------------------------------------------|-----------------------------------------|
| Hypertension           | I10-I16                                                                              | 401-405                                                                           |                                         |
| Dyslipidemia           | E78                                                                                  | 272                                                                               |                                         |
| Diabetes               | E08-E13                                                                              | 249-250                                                                           |                                         |
| Obesity                | E65-E68; Z68.3 - Z68.45; Z68.54                                                      | 278.0-278.3; V85.3-V85.4; V85.54                                                  |                                         |
| MI                     | I21-I24                                                                              | 410-412                                                                           |                                         |
| CVA                    | I60-I69                                                                              | 430-438                                                                           |                                         |
| Rheumatoid Arthritis   | M06                                                                                  | 714                                                                               |                                         |
| Ankylosing Spondylitis | M45                                                                                  | 720                                                                               |                                         |
| Multiple Sclerosis     | G35                                                                                  | 340                                                                               |                                         |
| IBD                    | K50-K52                                                                              | 555-556                                                                           |                                         |
| PCOS                   | E28.2                                                                                | 256.4                                                                             |                                         |
| Female Infertility     | N97                                                                                  | 628.0 - 628.9                                                                     |                                         |
| Tobacco                | Z72.0; Z87.891; F17.2                                                                | 305.1; V15.82                                                                     |                                         |
| Substance Use          | F10-F19; O99.32                                                                      | 303-305                                                                           | <i>Exclude 305.1</i>                    |
| Mental Health          | F01-F09; F20-F99                                                                     | 290-302; 306-319                                                                  | <i>Excludes substance use disorders</i> |
| Acne                   | L70                                                                                  | 706.0-706.1                                                                       |                                         |
| Cellulitis             | L03                                                                                  | 681-682                                                                           |                                         |
| Pilonidal Cyst         | L05                                                                                  | 685                                                                               |                                         |
| Cutaneous Melanoma     | D03; C43                                                                             | 172.0-172.9                                                                       |                                         |
| SCC                    | C44.02; C44.12; C44.22; C44.32;<br>C44.42; C44.52; C44.62; C44.72;<br>C44.82; C44.92 | 173.02; 173.12; 173.22; 173.32; 173.42;<br>173.52; 173.62; 173.72; 173.82; 173.92 |                                         |
| BCC                    | C44.01; C44.11; C44.21; C44.31;<br>C44.41; C44.51; C44.61; C44.71;<br>C44.81; C44.91 | 173.01, 173.11, 173.21, 173.31, 173.41,<br>173.51, 173.61, 173.71, 173.81, 173.91 |                                         |
| Psoriasis              | L40-L41                                                                              | 696.0-696.2; 696.8                                                                |                                         |

MI, myocardial infarction; CVA, cerebrovascular accident; IBD, inflammatory bowel disease; PCOS, polycystic ovary syndrome; SCC, squamous cell carcinoma; BCC, basal cell carcinoma

**Supplementary Table 2: Codes Used to Define Emergency Department (ED) Visits**

|                                       |                                                                                                                                                                        |
|---------------------------------------|------------------------------------------------------------------------------------------------------------------------------------------------------------------------|
| <i>Outpatient and inpatient files</i> |                                                                                                                                                                        |
| CPT                                   | 99281-99285                                                                                                                                                            |
| <i>Outpatient files</i>               |                                                                                                                                                                        |
| PROCGRP                               | 110, 111, 114                                                                                                                                                          |
| REVCODE                               | 0450, 0451, 0452, 0456, 0459, 0981                                                                                                                                     |
| STDPLAC                               | 23                                                                                                                                                                     |
| STDPROV                               | 220, 428                                                                                                                                                               |
| SVCSCAT                               | 10120, 10420, 10320, 10220, 12220, 20220, 10520, 20120, 21120, 21220, 22320, 22120, 30220, 30120, 30420, 30320, 30520, 30620, 31120, 31420, 31320, 31520, 31220, 31620 |
| <i>Inpatient files</i>                |                                                                                                                                                                        |
| STDPLAC                               | 23                                                                                                                                                                     |
| STDPROV                               | 220, 428                                                                                                                                                               |
| SVCSCAT                               | 10120, 10420, 10320, 10220, 12220, 20220, 10520, 20120, 21120, 21220, 22320, 22120, 30220, 30120, 30420, 30320, 30520, 30620, 31120, 31420, 31320, 31520, 31220, 31620 |

**Supplementary Table 3: Summary of HS Patient Demographics**

|                                       | <b>Overall</b> | <b>Asian</b>     | <b>Black</b>     | <b>Hispanic</b>  | <b>White</b> | <b>Unknown</b>   |
|---------------------------------------|----------------|------------------|------------------|------------------|--------------|------------------|
| No. of Patients n (% of total cohort) | 13667 (100%)   | 438 (3.2%)       | 2738 (20%)       | 1560 (11.4%)     | 8215 (60.1%) | 716 (5.2%)       |
| Gender n (%)                          |                |                  |                  |                  |              |                  |
| Female                                | 10054 (73.6%)  | 275 (62.8)       | 2141 (78.2)      | 1165 (74.7)      | 5967 (72.6)  | 506 (70.7)       |
| Male                                  | 3613 (26.4%)   | 163 (37.2)       | 597 (21.8)       | 395 (25.3)       | 2248 (27.4)  | 210 (29.3)       |
| Age at First Enrollment Mean (SD)     | 40.7 (17.3)    | 33.7 (14.1)      | 41.2 (16.8)      | 36.0 (16.7)      | 41.2 (17.3)  | 46.3 (18.7)      |
| Total Years of Enrollment Mean (SD)   | 5.1 (1.2)      | 5.0 (1.2)        | 5.0 (1.3)        | 5.1 (1.2)        | 5.2 (1.2)    | 5.0 (1.3)        |
| Education n (%)                       |                |                  |                  |                  |              |                  |
| Less than 12 <sup>th</sup> Grade      | 57 (0.4)       | 0 (0%)           | <11 <sup>A</sup> | >30 <sup>A</sup> | 15 (0.2)     | <11 <sup>A</sup> |
| High School Diploma                   | 3931 (28.8)    | >50 <sup>A</sup> | 1216 (44.4)      | 592 (38.0)       | 2002 (24.4)  | >60 <sup>A</sup> |
| Less than Bachelor's degree           | 7350 (53.8)    | 212 (48.4)       | 1365 (49.9)      | 767 (49.2)       | 4842 (58.9)  | 164 (22.9)       |
| Bachelor's Degree Plus                | 1871 (13.7)    | 165 (37.7)       | 146 (5.3)        | 161 (10.3)       | 1322 (16.1)  | 77 (10.8)        |
| Unknown                               | 458 (3.4)      | <11 <sup>A</sup> | <11 <sup>A</sup> | <11 <sup>A</sup> | 34 (0.4)     | 410 (57.3)       |
| Household Income n (%)                |                |                  |                  |                  |              |                  |
| <\$40K                                | 3189 (23.3)    | 56 (12.8)        | 1102 (40.3)      | 378 (24.2)       | 1603 (19.5)  | 50 (7.0)         |
| \$40K-49K                             | 951 (7.0)      | 26 (5.9)         | 239 (8.7)        | 137 (8.8)        | 524 (6.5)    | 25 (3.5)         |
| \$50K-59K                             | 930 (6.8)      | 20 (4.6)         | 208 (7.6)        | 127 (8.1)        | 556 (6.8)    | 19 (2.7)         |
| \$60K-\$74K                           | 1219 (8.9)     | 27 (6.2)         | 241 (8.8)        | 172 (11.0)       | 763 (9.3)    | 16 (2.2)         |
| \$75K-\$99K                           | 1664 (12.3)    | 36 (8.2)         | 256 (9.4)        | 176 (11.3)       | 1156 (14.1)  | 40 (5.6)         |
| \$100K+                               | 3194 (23.4)    | 168 (38.4)       | 253 (9.2)        | 280 (18.0)       | 2407 (29.3)  | 86 (12.0)        |
| Unknown                               | 2520 (18.4)    | 105 (24.0)       | 439 (16.0)       | 290 (18.6)       | 1206 (14.7)  | 480 (67.0)       |
| Insurance Type n (%)                  |                |                  |                  |                  |              |                  |
| Commercial                            | 10351 (75.7)   | 402 (91.8)       | 1922 (70.2)      | 1300 (83.3)      | 6344 (77.2)  | 383 (53.5)       |
| Medicare                              | 3316 (24.3)    | 36 (8.2)         | 816 (29.8)       | 260 (16.7)       | 1871 (22.8)  | 333 (46.5)       |

<sup>A</sup>Exact value not reported in order to comply with Optum data reporting restrictions.

**Supplementary Table 4: Summary of Control Patient Demographics**

|                                        | <b>Overall</b> | <b>Asian</b> | <b>Black</b> | <b>Hispanic</b> | <b>White</b>  | <b>Unknown</b> |
|----------------------------------------|----------------|--------------|--------------|-----------------|---------------|----------------|
| No. of Patients n (% of total cohort)  | 136670 (100%)  | 4380 (3.2%)  | 27380 (20%)  | 15600 (11.4%)   | 82150 (60.1%) | 7160 (5.2%)    |
| Gender n (%)                           |                |              |              |                 |               |                |
| <i>Female</i>                          | 100540 (73.6%) | 2750 (62.8)  | 21410 (78.2) | 11650 (74.7)    | 59670 (72.6)  | 5060 (70.7)    |
| <i>Male</i>                            | 36130 (26.4%)  | 1630 (37.2)  | 5970 (21.8)  | 3950 (25.3)     | 22480 (27.4)  | 2100 (29.3)    |
| Age at First Enrollment Mean (SD)      | 40.7 (17.3)    | 33.7 (14.1)  | 41.2 (16.8)  | 36.0 (16.7)     | 41.2 (17.3)   | 46.3 (18.7)    |
| Total Years of Enrollment Mean (SD)    | 5.2 (1.3)      | 5.2 (1.3)    | 5.2 (1.3)    | 5.2 (1.3)       | 5.2 (1.3)     | 5.2 (1.3)      |
| Education n (%)                        |                |              |              |                 |               |                |
| <i>Less than 12<sup>th</sup> Grade</i> | 627 (0.5)      | 18 (0.4)     | 77 (0.3)     | 404 (2.6)       | 108 (0.1)     | 20 (0.3)       |
| <i>High School Diploma</i>             | 31150 (22.8)   | 471 (10.8)   | 9973 (36.4)  | 5445 (34.9)     | 14170 (17.3)  | 1091 (15.2)    |
| <i>Less than Bachelor's degree</i>     | 75596 (55.3)   | 1994 (45.5)  | 14693 (53.7) | 7785 (49.9)     | 47237 (57.5)  | 3887 (54.3)    |
| <i>Bachelor's Degree Plus</i>          | 28881 (21.1)   | 1885 (43.0)  | 2557 (9.3)   | 1920 (12.3)     | 20385 (24.8)  | 2134 (29.8)    |
| <i>Unknown</i>                         | 416 (0.3)      | 12 (0.3)     | 80 (0.3)     | 46 (0.3)        | 250 (0.3)     | 28 (0.4)       |
| Household Income n (%)                 |                |              |              |                 |               |                |
| <\$40K                                 | 22089 (16.2)   | 399 (9.1)    | 8364 (30.6)  | 3019 (19.4)     | 9523 (11.6)   | 784 (11.0)     |
| \$40K-49K                              | 7863 (5.8)     | 171 (3.9)    | 2319 (8.5)   | 1195 (7.7)      | 3849 (4.7)    | 329 (4.6)      |
| \$50K-59K                              | 8164 (6.0)     | 202 (4.6)    | 2198 (8.0)   | 1310 (8.4)      | 4087 (5.0)    | 367 (5.1)      |
| \$60K-\$74K                            | 11781 (8.6)    | 346 (7.9)    | 2486 (9.1)   | 1547 (9.9)      | 6808 (8.3)    | 594 (8.3)      |
| \$75K-\$99K                            | 17952 (13.1)   | 517 (11.8)   | 2970 (10.9)  | 2071 (13.3)     | 11447 (13.9)  | 947 (13.2)     |
| \$100K+                                | 47306 (34.6)   | 1866 (42.6)  | 4374 (16.0)  | 3562 (22.8)     | 34671 (42.2)  | 2833 (39.6)    |
| <i>Unknown</i>                         | 21515 (15.7)   | 879 (20.1)   | 4669 (17.1)  | 2896 (18.6)     | 11765 (14.3)  | 1306 (18.2)    |
| Insurance Type n (%)                   |                |              |              |                 |               |                |
| <i>Commercial</i>                      | 117405 (85.9)  | 4176 (95.3)  | 22709 (82.9) | 14125 (90.5)    | 71090 (86.5)  | 5305 (74.1)    |
| <i>Medicare</i>                        | 19265 (14.1)   | 204 (4.7)    | 4671 (17.1)  | 1475 (9.5)      | 11060 (13.5)  | 1855 (25.9)    |

**Supplementary Table 5: Complete Characteristics of HS Patient Clusters**

| Cluster number         | 1            | 2                    | 3            | 4                    | 5            | 6            |
|------------------------|--------------|----------------------|--------------|----------------------|--------------|--------------|
| Cluster name           | Acne         | Substance dependence | Metabolic    | Metabolic-Autoimmune | Mild         | PCOS         |
| n                      | 2527         | 2886                 | 2828         | 2292                 | 1947         | 1187         |
| Age                    | 34.9         | 48.3                 | 58.6         | 60.7                 | 39.4         | 39.1         |
| Female                 | 2065 (81.7%) | 2065 (71.6%)         | 2034 (71.9%) | 1439 (62.8%)         | 1443 (74.1%) | 1008 (84.9%) |
| HS-related ED visits   | 166 (6.6%)   | 376 (13.0%)          | 314 (11.1%)  | 445 (19.4%)          | 187 (9.6%)   | 103 (8.7%)   |
| Cellulitis             | 900 (35.6%)  | 1331 (46.1%)         | 1314 (46.5%) | 1414 (61.7%)         | 652 (33.5%)  | 454 (38.3%)  |
| White                  | 1567 (62.0%) | 1994 (69.1%)         | 1621 (57.3%) | 1402 (61.2%)         | 1028 (52.8%) | 603 (50.8%)  |
| Black                  | 380 (15.0%)  | 507 (17.6%)          | 635 (22.5%)  | 510 (22.3%)          | 399 (20.5%)  | 307 (25.9%)  |
| Asian                  | 123 (4.9%)   | 39 (1.4%)            | 77 (2.7%)    | 30 (1.3%)            | 125 (6.4%)   | 44 (3.7%)    |
| Hispanic               | 341 (13.5%)  | 218 (7.6%)           | 324 (11.5%)  | 194 (8.5%)           | 293 (15.0%)  | 190 (16.0%)  |
| Unknown                | 116 (4.6%)   | 128 (4.4%)           | 171 (6.0%)   | 156 (6.8%)           | 102 (5.2%)   | 43 (3.6%)    |
| Hypertension           | 117 (4.6%)   | 1264 (43.8%)         | 2521 (89.1%) | 2156 (94.1%)         | 123 (6.3%)   | 647 (54.5%)  |
| Dyslipidemia           | 343 (13.6%)  | 1260 (43.7%)         | 2742 (97.0%) | 2129 (92.9%)         | 319 (16.4%)  | 181 (15.2%)  |
| Diabetes               | 90 (3.6%)    | 107 (3.7%)           | 1579 (55.8%) | 2162 (94.3%)         | 91 (4.7%)    | 139 (11.7%)  |
| Obesity                | 757 (30.0%)  | 1647 (57.1%)         | 2091 (73.9%) | 1901 (82.9%)         | 710 (36.5%)  | 1157 (97.5%) |
| MI                     | 7 (0.3%)     | 54 (1.9%)            | 137 (4.8%)   | 420 (18.3%)          | 5 (0.3%)     | 8 (0.7%)     |
| CVA                    | 46 (1.8%)    | 151 (5.2%)           | 412 (14.6%)  | 708 (30.9%)          | 26 (1.3%)    | 30 (2.5%)    |
| Psoriasis              | 127 (5.0%)   | 210 (7.3%)           | 192 (6.8%)   | 178 (7.8%)           | 85 (4.4%)    | 72 (6.1%)    |
| Rheumatoid Arthritis   | 55 (2.2%)    | 148 (5.1%)           | 212 (7.5%)   | 226 (9.9%)           | 37 (1.9%)    | 43 (3.6%)    |
| Ankylosing Spondylitis | 24 (0.9%)    | 85 (2.9%)            | 59 (2.1%)    | 107 (4.7%)           | 15 (0.8%)    | 11 (0.9%)    |
| Multiple Sclerosis     | 13 (0.5%)    | 35 (1.2%)            | 24 (0.8%)    | 29 (1.3%)            | 5 (0.3%)     | 9 (0.8%)     |
| IBD                    | 210 (8.3%)   | 340 (11.8%)          | 331 (11.7%)  | 354 (15.4%)          | 99 (5.1%)    | 106 (8.9%)   |
| PCOS                   | 74 (2.9%)    | 136 (4.7%)           | 123 (4.3%)   | 97 (4.2%)            | 29 (1.5%)    | 351 (29.6%)  |
| Tobacco                | 98 (3.9%)    | 2804 (97.2%)         | 412 (14.6%)  | 2169 (94.6%)         | 146 (7.5%)   | 105 (8.8%)   |
| Substance use          | 94 (3.7%)    | 2738 (94.9%)         | 66 (2.3%)    | 1876 (81.8%)         | 39 (2.0%)    | 30 (2.5%)    |

|                |              |              |              |              |           |             |
|----------------|--------------|--------------|--------------|--------------|-----------|-------------|
| Mental health  | 1999 (79.1%) | 1970 (68.3%) | 1643 (58.1%) | 1870 (81.6%) | 0 (0.0%)  | 409 (34.5%) |
| Acne           | 1378 (54.5%) | 604 (20.9%)  | 325 (11.5%)  | 259 (11.3%)  | 0 (0.0%)  | 644 (54.3%) |
| Pilonidal Cyst | 149 (5.9%)   | 162 (5.6%)   | 72 (2.5%)    | 104 (4.5%)   | 73 (3.7%) | 44 (3.7%)   |
| SCC            | 11 (0.4%)    | 57 (2.0%)    | 83 (2.9%)    | 64 (2.8%)    | 14 (0.7%) | 9 (0.8%)    |

MI, myocardial infarction; CVA, cerebrovascular accident; IBD, inflammatory bowel disease; PCOS, polycystic ovary syndrome; SCC, squamous cell carcinoma

**Supplementary Table 6: Percentage of Patients with Metabolic or Autoimmune Conditions<sup>A</sup>**

| <b>Cluster name</b>  | <b>Cluster number</b> | <b>Metabolic</b> | <b>Autoimmune</b> |
|----------------------|-----------------------|------------------|-------------------|
| Acne                 | 1                     | 7.1%             | 11.2%             |
| Substance dependence | 2                     | 52.2%            | 18.7%             |
| Metabolic            | 3                     | 100.0%           | 19.7%             |
| Metabolic-Autoimmune | 4                     | 100.0%           | 27.0%             |
| Mild                 | 5                     | 11.6%            | 7.8%              |
| PCOS                 | 6                     | 66.0%            | 13.4%             |

<sup>A</sup>A patient was considered to have a “metabolic” condition if the patient had at least 2 of the following: hypertension, dyslipidemia, diabetes, obesity, myocardial infarction (MI), or cerebrovascular accident (CVA) (chosen because metabolic syndrome is often defined as 2 or more of its associated comorbidities). A patient was considered to have an “autoimmune” condition if the patient had at least 1 of the following: rheumatoid arthritis, ankylosing spondylitis, multiple sclerosis, or inflammatory bowel disease (IBD).
